# Supplementary material for: Quantification of toxic metallic elements using machine learning techniques and spark emission spectroscopy
Source: Copernicus journal article supplement (doi:10.5194/amt-2019-377), 2019-10-23

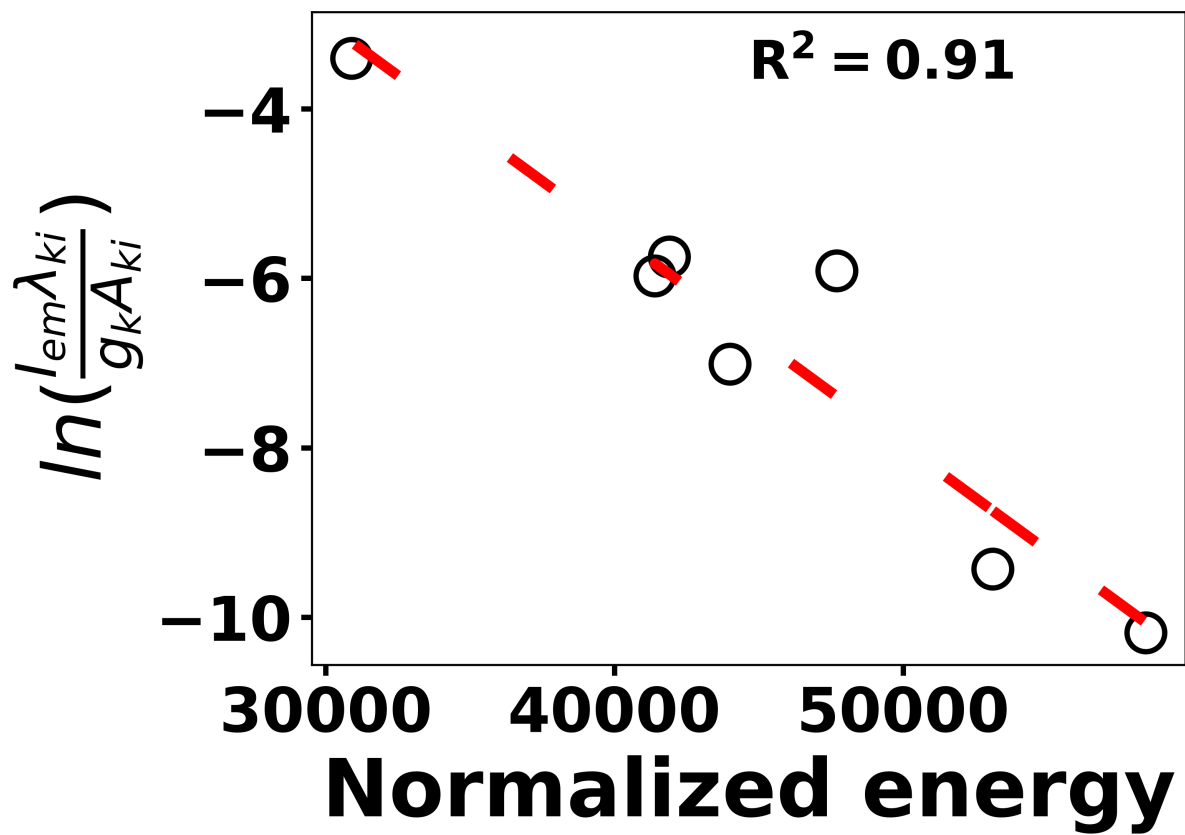

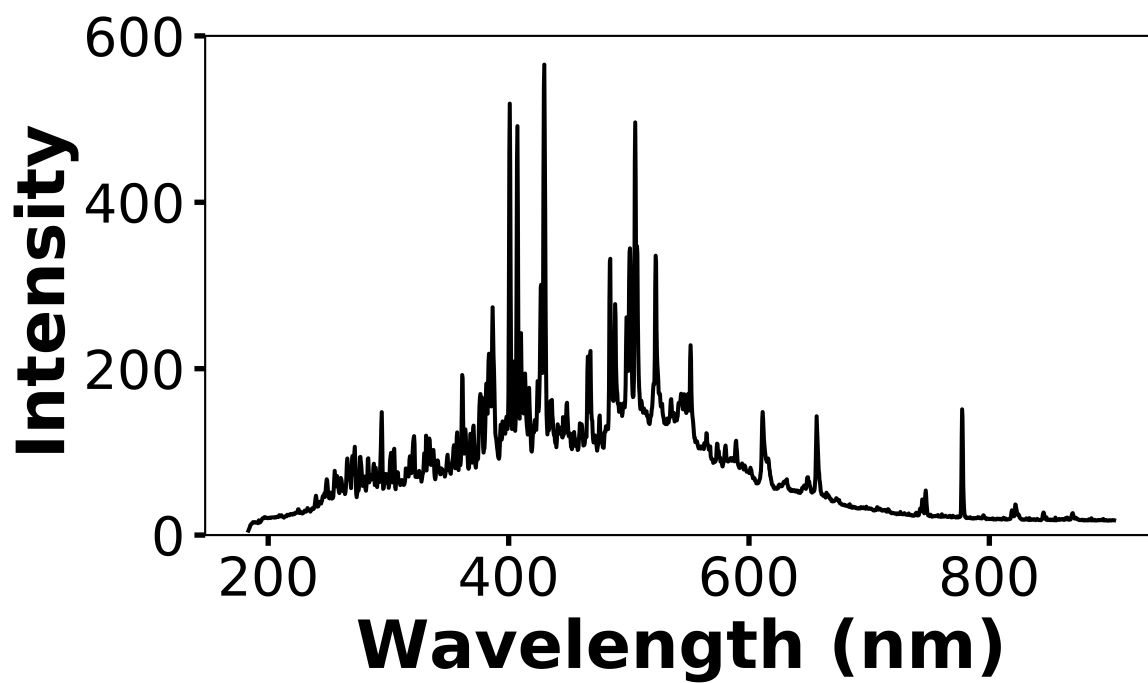

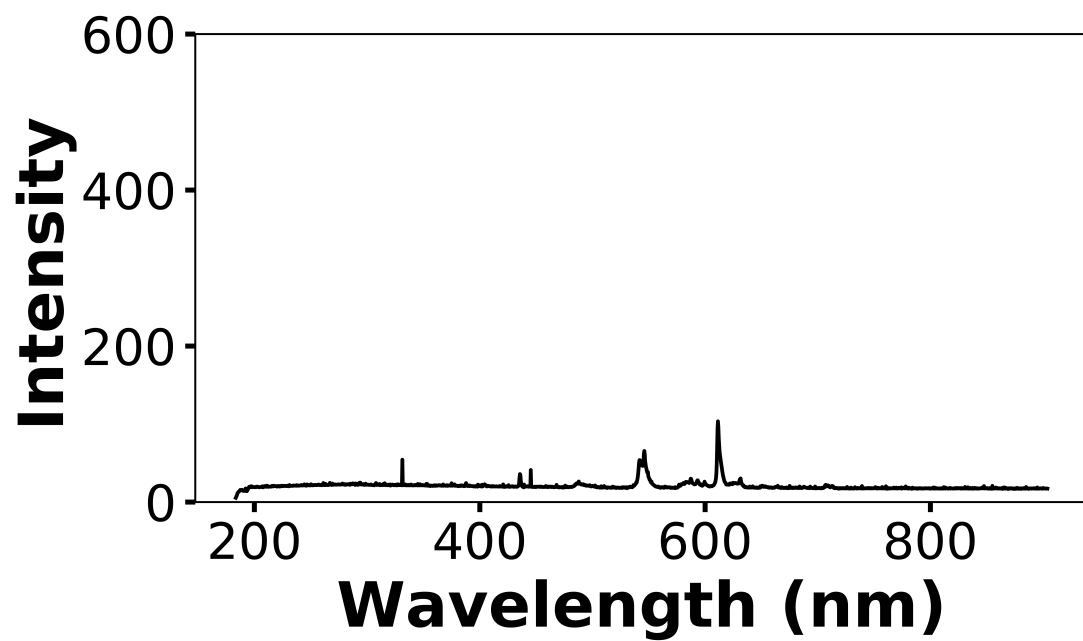

Supplement: Supplementary file [file amt-2019-377-AC3-supplement.pdf]
